## A rapid systematic review of the effectiveness of out-of-hours palliative care telephone advice lines for people living at home and their carers

Therese Johansson<sup>1,2</sup>, Rachel L. Chambers<sup>1</sup>, Thomas Curtis<sup>1</sup>, Sophie Pask<sup>3</sup>, Sarah Greenley<sup>4</sup>, Molly Brittain<sup>1</sup>, Anna E. Bone<sup>1</sup>, Lynn Laidlaw<sup>5</sup>, Ikumi Okamoto<sup>6</sup>, Stephen Barclay<sup>6</sup>, Irene Higginson<sup>1,7</sup>, Fliss E. M. Murtagh<sup>3,7</sup>, Katherine E. Sleeman<sup>1,7</sup>

<sup>1</sup> Cicely Saunders Institute of Palliative Care, Policy & Rehabilitation, King's College London, London, United Kingdom.

<sup>2</sup> Department of Neurobiology, Care Sciences and Society, Karolinska Institutet, Huddinge, Sweden.

<sup>3</sup> Wolfson Palliative Care Research Centre, Hull York Medical School, University of Hull, Hull, United Kingdom.

<sup>4</sup> Institute of Clinical and Applied Health Research, Hull York Medical School, University of Hull, Hull, United Kingdom.

<sup>5</sup> Cicely Saunders Institute Patient & Public Involvement Group, King's College London, London, United Kingdom.

<sup>6</sup> Department of Public Health and Primary Care, University of Cambridge, Cambridge, United Kingdom.

<sup>7</sup> King's College Hospital NHS Foundation Trust, London, United Kingdom.

Corresponding author: Therese Johansson, [therese.johansson@kcl.ac.uk](mailto:therese.johansson@kcl.ac.uk)

## Abstract

**Background:** People with palliative and end-of-life care needs in the community and their carers often rely on out-of-hours services to remain at home. Policymakers internationally have recommended implementation of telephone advice lines to ensure 24-hour access to support. However, little is known about their effectiveness.

**Aim:** To review the evidence for the clinical and cost effectiveness of out-of-hours- telephone advice lines for adults with palliative care needs living at home and their carers, and report service characteristics associated with effectiveness.

**Design:** Rapid systematic review, with narrative synthesis (PROSPERO ID: CRD42023400370).

**Data sources:** Three databases (Medline, EMBASE, CINAHL) were searched in February 2023 for studies reporting on telephone advice lines with at least partial out-of-hours availability. Study quality was assessed using the Mixed Methods Appraisal Tool.

**Results:** Twenty-one studies, published 2000-2022, were included. Most studies were observational; none were experimental. Three were comparative, and seven lacked explicit research questions or methods. Results were largely descriptive, focusing on service development and use, and process measures. Patient and carer outcomes were primarily reported qualitatively. Only two studies investigated possible system outcomes, by examining care-seeking behaviour after using telephone advice lines.

**Conclusion:** Existing evidence for the effectiveness of telephone advice lines is limited. The lack of experimental studies evaluating individual or system-level outcomes prevents assessment of the effectiveness/cost-effectiveness of service models. There is a clear need for more rigorous evaluations using consistent reporting, and inclusion of patient and carer perspectives during both development and implementation. Recommendations for future evaluations are provided.

## Keywords

Palliative care, After-hours care, Systematic review, Effectiveness, Telephone hotlines

## Key statements

### What is already known about the topic?

- Urgent and unplanned emergency department and hospital admission is frequent for people in the final months of life.
- Designated palliative care telephone advice lines have been recommended internationally to ensure round-the-clock access to support from trained professionals and are proposed to help reduce urgent and unplanned use of acute services.
- While a range of palliative care telephone advice lines exist, the evidence base for their effectiveness, in terms of patient and service use outcomes, is not known.

### What this paper adds

- This review provides an overview of published articles reporting palliative care telephone advice line models that have been developed and implemented.
- We demonstrate that existing research evidence for the effectiveness of telephone advice lines is limited and largely based on observational studies of insufficient methodological quality.
- Our synthesis of findings suggests telephone advice lines can offer guidance and reassurance that supports family carers in providing care at home for patients who prefer to die at home.

### Implications for practice, theory or policy

- Future development and evaluation of telephone advice lines need to include patients, carers, and other stakeholders to better understand what needs and preferences should shape the services.
- To address the limited and variable evidence identified, we provide recommendations for key components of structure and use of telephone advice line models that should be included in future research.

## 1 Background

2 People with palliative and end-of-life care needs living at home and their carers often rely on out-of-  
3 hours service providers<sup>1,2</sup>, particularly during periods of worsening symptoms, or changes in the  
4 individual's condition<sup>3</sup>.

5 Unscheduled care and out-of-hours care services are frequently accessed by people approaching the  
6 end of life<sup>1,4,5</sup>, with emergency care utilisation rising considerably in the final month of life<sup>6</sup>. Still, a  
7 large proportion of palliative care is delivered in the community<sup>7,8</sup>. Among those who die, almost  
8 30% are seen by out-of-hours primary care services during their last 30 days of life<sup>9</sup>.

9 Timely access to palliative care support and advice from trained professionals is essential to support  
10 patients who prefer to be cared for, and die, at home (and their informal carers) who might face a  
11 complex array of symptoms and care needs<sup>10,11</sup>. Despite international trends of increasing home  
12 deaths and the rising need for community-based palliative care<sup>12</sup>, access and provision of palliative  
13 care in the community is highly geographically variable<sup>8,13,14</sup>.

14 Palliative care telephone advice lines have been proposed internationally to provide timely support  
15 for people with palliative care needs and their carers, especially in rural areas<sup>15-17</sup>. In 2004, the UK  
16 National Institute for Health and Care Excellence has recommended provision of designated  
17 telephone advice lines to ensure that patients with life-limiting illnesses and their carers have round-  
18 the-clock access to support from trained palliative care professionals<sup>18</sup>. Almost 20 years later,  
19 however, designated palliative care telephone advice lines are not available everywhere in the UK,  
20 with 27% of areas having no access and 42% having only partial access during out-of-hours periods<sup>19</sup>.  
21 Consequently, many people rely on the national emergency numbers (i.e., 999 or NHS 111) and  
22 primary care service provision from out-of-hours General Practitioners and Community Nurses  
23 during these times. Though a wide variety of palliative care telephone advice lines are in use and  
24 development<sup>19</sup>, the effectiveness and cost-effectiveness of different service models has not been  
25 synthesised and the evidence base for their effectiveness and optimal implementation is limited.

## 26 Aim

27 Our aim was to review the evidence for the clinical and cost-effectiveness of out-of-hours telephone  
28 advice lines for adults with palliative care needs living at home and their carers, and report how  
29 service characteristics are associated with effectiveness.

## 30 Methods

### 31 Study design

32 This rapid systematic review was planned and conducted in line with guidelines set out by Cochrane  
33 Rapid Reviews Methods Group<sup>20</sup> and the World Health Organization<sup>21</sup>. The rapid review procedure is  
34 methodologically similar to a full systematic review but limits the scope and analytic process to  
35 provide a timely appraisal of existing evidence, e.g., by assigning a single reviewer for screening or  
36 limiting sources beyond electronic databases<sup>22</sup>. The reporting adheres to the Preferred Reporting  
37 Items for Systematic Reviews and Meta-Analyses (PRISMA) 2020 checklist<sup>23</sup>. A protocol was  
38 developed prior to commencing the study and made publicly available on PROSPERO  
39 (CRD42023400370).

### 40 Eligibility criteria

41 Any published study reporting on the use, effect, or implementation of a telephone advice line  
42 available specifically for home-based adults with palliative care needs and their carers during at least  
43 part of the out-of-hours period was eligible, even if it was not the primary focus of an intervention. A  
44 broad definition was used to allow assessment of various types of telephone advice lines, provided  
45 there was a 'reactive' component (i.e., contact is patient/carer-initiated, as opposed to pre-booked  
46 appointments). Detailed inclusion and exclusion criteria are shown in Table 1.

47

48 *Table 1. Inclusion/exclusion criteria*

|                   | <i>Inclusion criteria</i>                                                                                                                                                                                                                                                                                                                                                                                       | <i>Exclusion criteria</i>                                                                                                                                                                                                                                                                                                |
|-------------------|-----------------------------------------------------------------------------------------------------------------------------------------------------------------------------------------------------------------------------------------------------------------------------------------------------------------------------------------------------------------------------------------------------------------|--------------------------------------------------------------------------------------------------------------------------------------------------------------------------------------------------------------------------------------------------------------------------------------------------------------------------|
| <i>Population</i> | Study populations comprising adults (i.e., aged ≥18) living at home with palliative care needs and family/unpaid carers                                                                                                                                                                                                                                                                                         | Study populations solely comprising: <ul style="list-style-type: none"> <li>- children or adolescents (i.e., aged ≤18)</li> <li>- adult carers of paediatric patients</li> <li>- people without palliative care needs</li> </ul>                                                                                         |
| <i>Exposure</i>   | Any telephone advice line that is: <ul style="list-style-type: none"> <li>- available through telephone calls</li> <li>- designated for providing palliative care support, help, and information</li> <li>- reactive, i.e., contact is patient/carer-initiated</li> <li>- accessible during at least parts of the out-of-hours periods (weekdays between 18.30-08.00, weekends, and public holidays)</li> </ul> | Any telephone advice line that is: <ul style="list-style-type: none"> <li>- solely for health and social care professionals</li> <li>- designated for patients in institutional care settings</li> <li>- only available in-hours (weekdays between 08.00-18.30)</li> <li>- only providing bereavement support</li> </ul> |
| <i>Outcomes</i>   | - All outcomes related to patients, carers, services, and costs, provided they are directly related to the telephone advice line                                                                                                                                                                                                                                                                                | - No study will be excluded based on reported outcomes                                                                                                                                                                                                                                                                   |
| <i>Study type</i> | - Peer-reviewed publications of all types (with or without a comparator) reporting data related to implementation or use of telephone advice lines                                                                                                                                                                                                                                                              | - Studies reporting only review-level evidence<br>- Study protocols<br>- Opinion pieces or editorials<br>- Conference abstracts                                                                                                                                                                                          |

49

## 50 [Search strategy](#)

51 The searches were performed with assistance of an information specialist (SG) at Hull York Medical  
52 School, University of Hull. The search was developed in Medline by examining the indexing of known  
53 potentially relevant studies, designing, and testing a search using these studies before translation  
54 into other databases. Three databases were searched: Medline All from 1946, EMBASE from 1974  
55 (via OVID), and CINAHL Complete from 1937 via EbscoHost. The search used for Medline  
56 incorporated elements from previous strategies for palliative care by Rietjens et al.<sup>24</sup> and Sladek et  
57 al<sup>25</sup>, combining concepts of palliative care and out-of-hours telephone advice lines using both  
58 database specific indexed terms and free text terms. Filters were used to only retrieve primary  
59 studies written in English and to remove conference abstracts, books, and editorials. No date limits  
60 were applied. All searches were performed on February 9, 2023. The full search strategies for all  
61 databases are provided in supplementary file 1. Database results were downloaded into EndNote  
62 and duplicates were removed using a recognised method<sup>26</sup> before being uploaded into Covidence<sup>27</sup>.

## 63 [Study selection](#)

64 The first author (TJ) screened titles and abstracts against the inclusion criteria using Covidence. To  
65 ensure screening consistency, a subsample was screened by a second reviewer (RC) and any conflicts

66 were resolved by discussion. Full-text screening was performed independently by two reviewers (TJ  
67 and RC/MB), with any disagreements resolved by a third reviewer (AB).

## 68 Data extraction

69 A template for data extraction was constructed. Data were extracted by one reviewer (TJ) and  
70 checked by a second (RC/MB/TC). Extracted data were collated using Microsoft Excel. Data for  
71 clinical and cost effectiveness included any effects of the telephone advice lines related to impact on  
72 patients' and carers' health and wellbeing, symptom management, coping, caring capacity,  
73 emergency service use and hospitalisation, place of care, place of death, and experiences and  
74 satisfaction of service use. Data for cost effectiveness included: costs of providing the telephone  
75 advice line and related resource use (i.e., costs related to care service use). Due to the heterogeneity  
76 of study designs and reported outcomes, studies were not excluded from synthesis due to missing  
77 data.

## 78 Data synthesis

79 The quality of included studies was assessed using the *Mixed Methods Appraisal Tool*<sup>28</sup>, which yields  
80 a score ranging 1-5 that represents the number of quality criteria met for the specific study type.  
81 Given the scarcity of literature, all included studies were considered relevant for the review aims and  
82 were retained for synthesis regardless of their quality appraisal score.

83 Due to heterogeneity in aims, methods, and outcomes of included studies, study findings were  
84 synthesized narratively<sup>29</sup>. The synthesis was guided by Donabedian's three-component framework  
85 for evaluating quality of care<sup>30</sup>, which encompasses *structures* (physical resources and staff to ensure  
86 the intervention is delivered), *processes* (how structural components are used and transactions  
87 between care recipients and providers), and *outcomes* (effects on patients' and carers' health and  
88 wellbeing, health-related behaviours, and satisfaction with care).

89 Findings relating to telephone advice line characteristics, usage, and reported study outcomes were  
90 mapped onto Donabedian's framework<sup>30</sup>. Since this review presents outcomes of clinical  
91 effectiveness at a population level, we differentiated outcomes of care as *patient/carer outcomes*  
92 (i.e., health status, wellbeing, and coping), and *health care system outcomes* (i.e., impact on the use  
93 of care services). Although Donabedian's framework conceptualizes patient satisfaction and  
94 experience as partly separate to outcomes in care quality assessment, it was incorporated here as a  
95 facet of patient/carer outcomes as it is influenced by patient and environmental factors<sup>31</sup>.

96 Findings from the review were discussed with the project patient and public involvement (PPI)  
97 advisory group, as well as in an online workshop with ten volunteers identified through the PPI

108 forums of King's College London and University of Hull to help shape the synthesis<sup>32</sup>. Advice from PPI  
109 members was sought on interpreting key messages, understanding essential characteristics of advice  
110 lines, and how the findings resonated with their lived experience.

101

## 102 Results

103 The database searches identified 622 articles. After removing duplicates, 388 articles remained for  
104 screening based on title and abstract (of which 80 randomly selected articles were dual screened). In  
105 total, 340 articles were excluded, leaving 48 for full text review. Twenty-one articles were included in  
106 the review. The PRISMA flow chart is presented in Figure 1, stating reasons for exclusion at each  
107 stage.

## 108 Study descriptives

109 The 21 included studies were published between 2000 and 2022. Around half were conducted in the  
110 United Kingdom ( $n=11$ )<sup>33-43</sup>, with the remaining studies coming from Australia ( $n=4$ )<sup>44-47</sup>, the United  
111 States ( $n=2$ )<sup>48, 49</sup>, Canada ( $n=1$ )<sup>50</sup>, The Netherlands ( $n=1$ )<sup>51</sup>, Singapore ( $n=1$ )<sup>52</sup> and Taiwan ( $n=1$ )<sup>53</sup>.

112 Eight of the studies were quantitative (of which three were comparative)<sup>41, 44, 45, 48, 49, 51-53</sup>, five used  
113 mixed-methods<sup>35, 36, 38, 39, 47</sup>, and one was qualitative<sup>42</sup>. Seven studies did not specify a methodology.  
114 Of these, four reported quantitative and qualitative data<sup>34, 37, 40, 50</sup>, and three presented quantitative  
115 data only<sup>33, 43, 46</sup>.

116 Most studies were retrospective observational studies or audits, using quantitative data either from  
117 existing call logs or purpose-built proformas for incoming calls to the telephone advice line as the  
118 primary source of data ( $n=15$ ). Qualitative data were usually collected through feedback surveys or  
119 follow-up interviews with a sub-sample of callers. Table 2 presents the methodology of included  
120 studies.

121

122



123 *Figure 1. PRISMA flow diagram for systematic literature search results.*

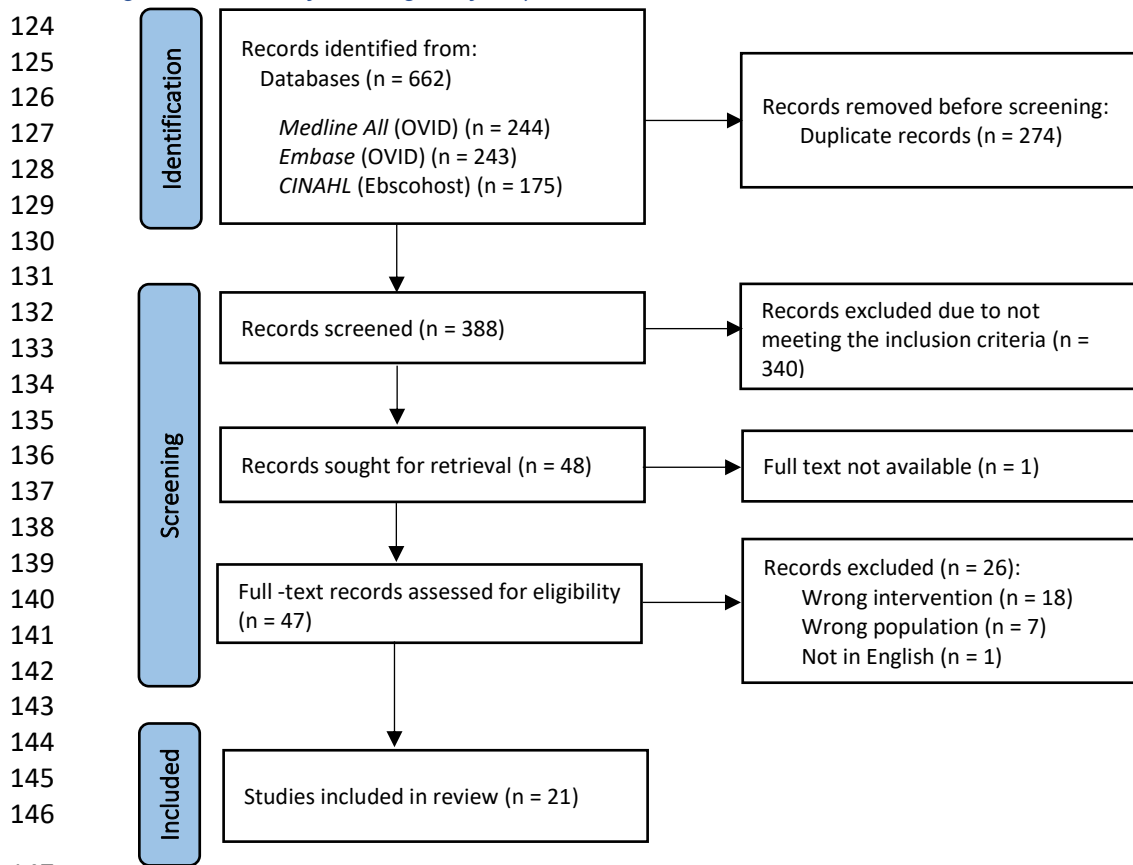

149 *Table 2. Overview of the methodology of included studies, grouped according to study type and*  
 150 *ordered according to quality appraisal score.*  
 151 [separate document]

152  
 153 **Synthesis**

154 **Study quality**

155 Overall, the quality appraisal found that few studies were empirically robust. Seven studies could not  
 156 be appraised as they lacked an explicit study aim or research question, and therefore did not meet  
 157 the Mixed Methods Appraisal Tool screening criteria for empirical studies<sup>33, 34, 37, 40, 43, 46, 50</sup>. Of the 14  
 158 that were appraised, most had moderate or low scores (three or lower, corresponding to meeting  
 159 60% of quality criteria or less), primarily due to either poor or poorly described study methodology.  
 160 Mixed Methods Appraisal Tool scores for each study are presented in Table 2.

161 **Telephone advice line characteristics (structures of care)**

162 The 21 included studies featured 20 unique telephone advice lines, with one appearing in two  
 163 studies (*Delivering Choice Programme's* out-of-hours advice line<sup>41, 42</sup>) and one being reported post-

164 implementation and re-evaluated after three years (*Palcall* telephone advice line<sup>34, 37</sup>). One further  
165 study<sup>43</sup> reported two different telephone advice lines.

166 The main characteristics of the telephone advice lines in each study are provided in Table 3, with a  
167 summary of findings presented in Figure 2. Overall, 13 of the telephone advice lines were available  
168 for calls 24/7 and six were available during parts of the out-of-hours periods. One study did not state  
169 availability<sup>36</sup>. Fifteen of the telephone advice lines were accessible only for patients known to  
170 palliative care services (and their carers) or listed on palliative care registers, but information on how  
171 they were promoted or explained to patients and carers was uncommon. Information about the  
172 structure of the telephone advice lines was scant. Less than half of the studies described the location  
173 and coverage of the telephone advice line. The majority of services were not diagnosis-specific, with  
174 just one being restricted to cancer patients<sup>51</sup>. When reported, telephone advice lines were either  
175 financed by time-specific grants or funded internally by the service (Table 3).

176 While the process of designing and implementing the telephone advice line service was described in  
177 several studies<sup>34, 37, 39, 40, 43, 44, 47, 50, 51</sup>, PPI or stakeholder consultation was rarely mentioned and only  
178 two studies reported involving patients and carers during development and feasibility testing of  
179 services<sup>34, 37</sup>. Two further studies mentioned consulting key stakeholders during development but  
180 provided no detailed information on who or what this entailed<sup>43, 47</sup>.

181

182 *Table 3. Characteristics of telephone advice line services reported in the included studies.*  
183 [separate document]

184 *Figure 2. Summary of reported study findings applied to Donabedian's framework of structures,*  
185 *processes, and outcomes of care.*  
186 [separate document]

187

188 Service use (processes of care)

189 Aspects of service use were reported in 18 of 21 studies, usually related to call volumes, timing of  
190 calls, identities of callers, reasons for calling, and information on how the call was handled by the  
191 responder or the organization (Figure 2).

192 In the seven studies that had 24/7 telephone advice lines and reported call data, between 19-69% of  
193 calls were received during out-of-hours periods<sup>33, 35, 38, 43, 46, 52, 53</sup>. Of these, most out-of-hours calls  
194 (35-78%) were received on weeknights before midnight, though the level of detail in reports  
195 differs<sup>34, 36, 37, 39-42, 44, 45, 47-51</sup>.

196 In the 12 studies that distinguished caller identities, callers were primarily identified as family  
197 members or informal carers (ranging 45-88% of calls)<sup>33, 34, 36, 37, 40, 45, 47, 48, 51-53</sup>. Additional  
198 characteristics of out-of-hours callers, such as sociodemographic information, were presented in two  
199 studies. A study from Singapore by Chong et al.<sup>52</sup> reported gender (48.6% male), age (mean age 75.5  
200 years), cancer diagnosis (80.9%), ethnicity (80.3% Chinese, 9.5% Malay, 5.2% Indian, 5.0% Other),  
201 and marital status (62.0% married, 26.9% widowed, 6.5% single, 4.6% divorced or separated). An  
202 American study by Mayahara et al.<sup>49</sup> reported ethnicity (patients: 73% White, 5% Black, 2% Asian,  
203 20% Other; carers: 50% White, 25% Black, 25% Asian, 5% Other) and gender (60% female patients,  
204 80% female carers), as well as diagnoses (most patients had ‘senile degeneration of the brain’  
205 (n=212) and/or Alzheimer’s disease (n=116), heart failure (n=71), chronic obstructive pulmonary  
206 disease (n=58) or other advanced illnesses). Moreover, four studies reported basic demographics  
207 such as diagnosis, age, gender, or household composition for a wider patient sample registered with,  
208 or eligible to access, the service<sup>38, 41, 44, 51</sup>. Baird-Bower et al.<sup>45</sup> collected certain sociodemographic  
209 information of callers by linking call log data to patient records, but only reported callers’ location.

210 Reasons for calling were presented in 12 studies, with varying degrees of detail. The most reported  
211 call reason was managing symptoms and/or medication (n=10), with other reasons involving health  
212 deterioration, nursing advice, requests for new or additional medication or equipment, or reporting  
213 that the patient had died<sup>33, 34, 39, 40, 43, 44, 47, 48, 51, 52</sup>. Since few studies provided information about  
214 follow-up periods, data about when in the care trajectory calls were made were scarce. Purdy et al.  
215 found that median time for accessing the telephone advice line was 10 days before death<sup>41</sup> and Jiang  
216 et al.<sup>48</sup> reported that most calls occurred between the first days of home hospice admission and the  
217 last three days of life. Roberts et al.<sup>50</sup> and Middleton-Green et al.<sup>38</sup> presented qualitative data  
218 indicating that people call in the final days of life for advice and support when the patient is dying, as  
219 exemplified by this carer: “*I think I just asked the question ‘is this what I think it is?’ And I think all*  
220 *they said was ‘yes, probably’”<sup>38</sup>.*

221 Fifteen studies gave some information about call handling. Actions available to responders differed  
222 between telephone advice lines and were variably described. Overall, the most reported actions  
223 taken by responders involved providing support and nursing advice appropriate to their level of  
224 clinical training, and transferring or signposting callers to other services. Responders in some  
225 telephone advice lines also contacted on-call teams for urgent home visits (n=5), arranged next-  
226 working-day follow-up at home or over the telephone (n=9), and, less commonly, helped with  
227 prescribing or collecting medication (n=4) (Table 3). Ten studies reported that responders  
228 successfully handled many calls directly through over-the-phone support<sup>33, 34, 38, 40, 44, 46, 48, 50, 51, 53</sup>. In  
229 cases when a responder could not adequately help a caller, calls were usually passed on to more

230 senior healthcare professionals, commonly senior palliative care nurses, clinical nurse specialists, or  
231 GPs, who were either available on-call or in-house (n=11)<sup>33, 35, 38, 40, 42-44, 46, 48, 50, 51</sup>. These professionals  
232 could generally provide more advanced medical advice, arrange home-visits, make referrals, and  
233 occasionally, prescribe or dispatch medicines. However, the proportion of calls passed on was rarely  
234 reported.

#### 235 Effectiveness (outcomes of care)

236 Reported outcomes in the studies primarily related to patients' and carers' qualitative accounts of  
237 using a service and derived from open-ended survey questions or interviews rather than quantitative  
238 outcomes. A small number of studies used patient records to assess possible change in use of health  
239 care services and estimated costs or cost-savings in relation to expected benefits.

#### 240 *Patient and carer outcomes*

241 No study provided quantitative data about effects on patient and carer outcomes. However, there  
242 was qualitative evidence of patient and carer reports of benefit. Patients and carers reported that  
243 the telephone advice lines provided general information, medical advice, and practical guidance  
244 about symptom management or care procedures<sup>36, 38, 40, 42, 47</sup>. This was exemplified by a carer in  
245 Phillips et al.'s study<sup>47</sup> stating that *"You have the information but when you go to do it, it is really*  
246 *scary. It was so good to have someone just telling me I was doing the right thing"*. Furthermore, the  
247 same study found that accessing advice enabled carers to continue caring at home, and Carlebach  
248 and Shucksmith<sup>36</sup> highlighted how this promoted independence for patients at home who would  
249 otherwise rely on family and friends.

250 A recurring finding was that the telephone advice lines provided valuable opportunity for patients  
251 and carers to ask about signs and symptoms and be informed about the disease trajectory or the  
252 dying process, so that callers can better understand whether these are 'normal' or expected<sup>38, 42, 50</sup>.  
253 This was exemplified by a carer quoted by Middleton-Green et al.<sup>38</sup>:

254 *"[It] helped, just that somebody could tell me what was, reassure me that what I was seeing*  
255 *and experiencing ... it meant that I could just be in the moment with her. It gave me sort of*  
256 *control over my feelings, which ultimately meant that she was looked after better than she*  
257 *would have been"*

258 Receiving appropriate information was also reported to aid decision-making and help prevent  
259 unnecessary hospital admission and promote appropriate use of care services, as patients and carers  
260 noted that they might otherwise have contacted emergency care services<sup>38, 42, 47</sup>.

261 Some studies reported how telephone advice line staff would liaise with other services on patients'  
262 behalf, which was advantageous when callers were requesting medication, care equipment, or home

263 visits<sup>35, 38</sup>. Carlebach and Shucksmith<sup>36</sup> highlighted callers sense of comfort when responders were  
264 familiar to the patient's case. Similarly, access to patient records was described as valued by callers  
265 who did not have to re-explain the situation, as described by a carer quoted by Campling et al.<sup>35</sup>:  
266 *"You don't have to go through the rigmarole of explaining everything. They've got your records there;*  
267 *they can see clearly what's going on..."*.

#### 268 Patient and carer experiences

269 Patient and carer experiences of using the telephone advice lines were reported in eight studies  
270 using qualitative data<sup>35, 36, 38-40, 42, 47, 50</sup>. User experiences were overwhelmingly positive. Calls were  
271 generally triggered by a patient crisis or carer uncertainty. Both patients and carers emphasised  
272 feeling reassured by the knowledge that the service was available for them whenever they might  
273 need it, both in medical crises and when the caller was feeling uncertain or worried<sup>36, 38, 40, 42, 47, 50</sup>. In  
274 Milton et al.' study<sup>39</sup>, feedback from a carer stated that *"There was comfort in knowing [staff] were*  
275 *on standby when you needed them; [it] made things easier, not being alone here"*. In demanding  
276 situations, only having one phone number to call to get direct access to experienced staff was  
277 perceived as helpful. Wye et al.<sup>42</sup>, for example, presented a carer who noted that: *"I didn't ever have*  
278 *to phone for ambulances or anything, all that was done and it wasn't done through the GP or the*  
279 *district nurse... you could just phone one number"*.

#### 280 Health care system outcomes

281 Seven studies reported outcomes relating to callers' subsequent care service use but only two of  
282 these were comparative. These linked calls to routine data over a defined follow-up period. Both  
283 demonstrated that patients who accessed telephone advice lines were less likely to use emergency  
284 care services. Baird-Bower et al.<sup>45</sup> examined patient records and mortality data up to six months  
285 after service use and found that users were less likely to call for an ambulance ( $\chi^2=70.094, p<0.01$ )<sup>45</sup>  
286 or visit an emergency department ( $\chi^2=78.286, p<0.01$ ) compared to people who never called. Purdy  
287 et al.<sup>41</sup> had a shorter follow-up period but found that emergency department attendance was lower  
288 among callers compared to a cohort without access to a telephone advice line service both 30 (OR  
289 0.60,  $p=0.007$ ) and 7 days before death (OR 0.34,  $p=0.003$ ). They also showed that callers were less  
290 likely to be admitted to hospital in the last week of life (OR 0.44,  $p=0.005$ ) and to die in hospital (OR  
291 0.34,  $p<0.001$ ) compared to patients who did not use the service<sup>41</sup>.

292 While there was little evidence for whether calls influence patients' and carers' subsequent care  
293 seeking behaviour, six studies demonstrated that, overall, only between 1.5-9.0% calls led to  
294 hospitalization or admission of patients<sup>38, 39, 46, 48, 50, 52</sup>. This suggests that hospitalisation is infrequent  
295 following out-of-hours calls, although the lack of data makes it hard to determine the effect of

296 telephone advice lines on subsequent admission. Three retrospective cross-sectional studies  
297 reported that 73-95% of patients who contacted the telephone advice line remained at home 24  
298 hours after the call<sup>38, 40, 50</sup>. There was, however, no further follow-up on actual place of death. In  
299 addition, Aranda et al. reported that 37% of all deaths during the study period occurred at home, but  
300 this was not temporally or causally linked to use of the telephone advice line<sup>44</sup>.

### 301 *Cost effectiveness*

302 There was very scant evidence regarding costs or cost effectiveness of telephone advice lines. Three  
303 studies presented rough estimations of costs associated with implementing telephone advice lines  
304 within a specific service, suggesting they were generally 'resource-effective' for providing palliative  
305 care during out-of-hours periods, but did not provide detailed cost breakdowns or include cost-  
306 savings related to potential benefits of the service<sup>39, 47, 51</sup>. Mayahara & Fogg<sup>49</sup> argued that reducing  
307 avoidable out-of-hours home visits in response to, e.g., medication or equipment requests would  
308 save overall health system costs but did not provide a cost-analysis.

309 Two studies provided wider cost-benefit estimations, but both were based on estimated rather than  
310 observed impact. Baird-Bower et al.<sup>45</sup> estimated that use of the telephone advice line could lead to  
311 general cost savings associated with less use of avoidable emergency care for people who want to  
312 die at home, with projections of 28% lower emergency department attendance saving 121,647  
313 Australian dollars and a 35% reduction in ambulance calls saving 112,700 Australian dollars.  
314 Campling et al.<sup>35</sup>, on the other hand, reported that for the purposes of improving out-of-hours  
315 access to medicines for patients at home, the telephone advice line model incurred slightly higher  
316 costs than other models of care (1-year cost of prescribing for an assumed English patient  
317 population with palliative care needs estimated to £60,075,302, compared to £49,483,750 for  
318 standard general practice prescriptions and £43,267,634 for clinical nurse specialist prescriptions).

319

## 320 Discussion

321 Although telephone advice lines are recommended in palliative care policy and guidelines, and  
322 widely implemented at local levels, our study found very limited empirical evidence for their clinical  
323 and cost effectiveness. Most studies report process measures, e.g., service use and handling of calls,  
324 whereas the potential impact on patient and carer health, wellbeing, and caring capacity, or  
325 influence on subsequent service use and costs is rarely assessed in a rigorous manner.

326 Findings from the more methodologically robust studies suggest possible support for the clinical  
327 effectiveness of telephone advice lines, with use being associated with remaining at home following

328 the call and less contact with emergency care services<sup>38, 41, 45, 50</sup>. However, most studies were  
329 observational, often of low methodological quality without control or comparator groups and can  
330 therefore not establish causality. Similarly, qualitative data indicate that the mechanism of action for  
331 reducing unnecessary or inappropriate emergency care use is the provision of care advice and  
332 emotional reassurance from trained staff, which enables patients and carers to better cope with  
333 care provision at home, if the patient prefers this. The possible influence on emotional wellbeing and  
334 caring capacity is a promising finding considering projected rises of home deaths and increasing  
335 work for informal carers when palliative care provision shifts towards being community-based<sup>54, 55</sup>,  
336 especially since anxiety has been shown to contribute strongly to urgent care-seeking behaviour<sup>56</sup>.

337 Telephone advice line models varied according to accessibility, structure of service provision, and  
338 integration with other care services. Limitations of the synthesised data, e.g., poor quality and  
339 inconsistent or insufficient reporting, prevented meaningful assessment of which telephone advice  
340 line models are most effective. Taken together, however, the included studies suggest that  
341 telephone advice lines might provide patients and carers at home with a viable alternative to  
342 emergency care when health deteriorates outside the normal working hours of care services, which  
343 is in line with other studies exploring reasons for contacting care services out-of-hours at the end of  
344 life<sup>57, 58</sup>.

345 Most of the evidence derived from local studies on telephone advice lines services that are  
346 accessible primarily to people known to the providing care services, which raises questions regarding  
347 equity of access, as the wider population of people with palliative care needs in the community  
348 remain under-served. While a few studies<sup>41, 44, 52</sup> considered differences in the use of telephone  
349 advice lines according to diagnosis, no studies analysed patterns of use according to socioeconomic  
350 position, ethnicity, or those with limited language proficiency. Language barriers in particular  
351 constitutes a key challenge associated with worse quality of care<sup>59</sup> and higher rates of emergency  
352 care use at the end of life<sup>60</sup>.

353 Another gap in the existing literature relates to integration with other services, e.g., the extent to  
354 which patient records were accessible to staff responding to calls and shared with other health care  
355 professionals. Inadequate integration with the wider health care system has previously been  
356 identified as contributing to inequity in access to community-based palliative care and may limit  
357 benefits for patients and carers<sup>61</sup>. While it was not possible to assess whether access to patient  
358 records influences the effectiveness of telephone advice lines, the included studies suggest that such  
359 access to records allows responding staff to better understand the patient's circumstances and  
360 provide appropriate advice.

361 Several of the included articles were based on internal audits rather than empirical research studies,  
362 which limits the generalisability of the evidence. In addition, most articles only encompassed service  
363 users, who might not be representative of the larger population of home-based adults with palliative  
364 care needs. Another potential source of bias is that authors in eight of the included articles were  
365 evaluating telephone advice lines services in which they had clinical or managerial roles<sup>62</sup>. The  
366 additional finding that patient and public involvement during stages of planning, designing, and  
367 evaluating telephone advice lines processes was uncommon, or at least rarely reported, further  
368 emphasises that the current literature relies heavily on the professional perspective. Inadequate use  
369 and reporting of patient and public involvement makes it difficult to gauge whether existing  
370 telephone advice lines are meeting the needs and preferences of the patients and carers they intend  
371 to serve. Involving patients and carers in co-design and evaluation is imperative to ensure relevance  
372 and patient-centred care delivery and will help identify hindering and facilitating factors for use<sup>13, 63</sup>.  
373 Use of guidelines, such as Guidance for Reporting Involvement of Patients and the Public<sup>64</sup> in future  
374 studies is strongly recommended.

### 375 [What this review adds](#)

376 Our findings have important implications for policy and research. The insufficient evidence base for  
377 telephone advice lines that we identify here stems largely from a lack of comprehensive and robust  
378 evaluations. The predominance of descriptive results (focusing on who calls, when and why they call,  
379 and how calls are handled by responding staff) reflects findings from previous reviews of telehealth<sup>65</sup>  
380 and digital technologies used in palliative care practice without a strong evidence base<sup>66, 67</sup>.

381 To determine the effectiveness of telephone advice lines on an individual and population level in  
382 relation to costs, prospective studies with longer follow-up periods and linked to routine data  
383 identifying service use<sup>68</sup> are necessary. Adhering to such standards would promote more rigorous  
384 and comparable research and help build an evidence base for effectiveness. Recommendations for  
385 key components of structure and use of telephone advice lines to record and report in future  
386 evaluations are presented in Supplementary file 2.

### 387 [Strengths and limitations](#)

388 A major strength of this review is its relevance and rapidity. Finding specific and evidence-based  
389 ways to improve community-based palliative and end of life care is important if the growing demand  
390 for community-based care is to be met. Telephone advice lines are currently garnering much interest  
391 in policy and practice and it is important to provide a synthesised evidence-base to inform future  
392 development and implementation of these services. The decision to include all relevant articles  
393 identified in our search, regardless of their quality appraisal also strengthens the study, as we could



394 demonstrate the poor scientific standard of the existing literature, with a third of the identified  
395 studies not judged as reaching the criteria of empirical research. By only including peer-reviewed  
396 articles, however, we might have missed relevant evaluations of additional telephone advice lines in  
397 published but not peer-reviewed reports, which is a limitation. The rapid review methodology  
398 resulted in searching a limited number of databases and supplementary searching of grey literature  
399 or forward and backward citation searching was not utilised. However, the search strategies were  
400 carefully designed and tested against known relevant studies by an experience information  
401 specialist<sup>69</sup>. Though most of the abstract and title screening was conducted by a single reviewer,  
402 which might increase the risk of missing relevant studies, single screening has been found to be  
403 equally sensitive for providing a sufficient evidence base in studies with focused clinical review  
404 questions as dual screening<sup>70</sup>.

405 Despite the rapid approach of this review, we incorporated discussions with PPI representatives with  
406 lived experience of end-of-life care at several stages of the study process, using both one-time and  
407 continuous approaches<sup>32</sup>, to guide data extraction, synthesis, and presentation of results. This  
408 enhances the relevance of the study for patients and carers.

## 409 Conclusion

410 Despite being recommended in policy and increasingly used in community-based palliative care  
411 services, evidence for the clinical and cost effectiveness of telephone advice lines is limited. Existing  
412 evidence primarily constitutes descriptive reports of service use and service structures, and  
413 qualitative accounts of carers' and patients' experiences of using telephone advice lines. Overall, our  
414 findings suggest that telephone advice lines provide guidance and reassurance that can support care  
415 at home and reduce avoidable emergency care use in the last months of life. The variability in  
416 reporting, and poor methodological quality, across studies hindered meaningful synthesis evidence  
417 regarding patient/carer and health care system outcomes. Development of new telephone advice  
418 line services ought to include patients and carers to ensure that needs and preferences of intended  
419 users are considered, and our provided recommendations for more rigorous evaluations should be  
420 followed to strengthen the evidence base.

## 421 Supplement files

### 422 S1. Search strategies

423 Separate document.

### 424 S2. Recommendations for future evaluations.

425 Separate document.

426

## 427 Declarations

### 428 Authorship

429 T.J. was responsible for the design of the study, with critical input from all authors. S.G., T.J., and S.P.  
430 developed the search strategy and S.G conducted the searches. T.J., T.C., R.C., M.B. and A.B. were  
431 screened articles for inclusion, extracted data, and performed quality appraisal. All authors  
432 contributed to analysis and interpretation of data. T.J. was responsible for drafting and revising the  
433 manuscript. All authors critically revised the manuscript for intellectual content, and read and  
434 approved the final manuscript.

### 435 Funding

436 This study was conducted as part of the Better End of Life Programme which is funded by Marie  
437 Curie (grant MCSON-20-102) and carried out by King's College London in collaboration with Hull York  
438 Medical School, University of Hull, and University of Cambridge. The funder was not involved in the  
439 study design, analysis, or interpretation of results. K.E.S. is the Laing Galazka Chair in palliative care  
440 at King's College London, funded by an endowment from Cicely Saunders International and the Kirby  
441 Laing Foundation. I.H. is an NIHR Senior Investigator Emeritus. F.E.M.M. is a National Institute for  
442 Health Research (NIHR) Senior Investigator. I.H. and S.B. are supported by the NIHR Applied  
443 Research Collaboration (ARC) South London (SL) and NIHR ARC East of England, respectively. The  
444 views expressed in the report are those of the authors and not necessarily those of the NIHR, or the  
445 Department of Health and Social Care.

### 446 Conflicts of interest

447 The authors declare that there is no conflict of interest with respect to the research, authorship, or  
448 publication of this article.

### 449 Ethics and consent

450 Ethical approval was not required for this review as there was no direct patient contact or access to  
451 individual participant data.

### 452 Data sharing

453 This review is registered on the PROSPERO database (CRD42023400370, available at  
454 [rd.york.ac.uk/prospero/display\\_record.php?RecordID=400370](http://rd.york.ac.uk/prospero/display_record.php?RecordID=400370)) and the full search strategy is  
455 provided in the Supplementary material. Inclusion/exclusion criteria and quality appraisal results are  
456 available in the article. Additional data will be made available upon request.

457

458

## 459 Reference list

460

### References

- 461 1. Papavasiliou E, Hoare S, Bowers B, Kelly MP and Barclay S. Out-of-hours services and end-of-  
462 life hospital admissions: a complex intervention systematic review and narrative synthesis. *Br J Gen*  
463 *Pract.* 2021; 71: e780-e7.
- 464 2. Fisher RF, Lasserson D and Hayward G. Out-of-hours primary care use at the end of life: a  
465 descriptive study. *Br J Gen Pract.* 2016; 66: e654-60.
- 466 3. Worth A, Boyd K, Kendall M, et al. Out-of-hours palliative care: a qualitative study of cancer  
467 patients, carers and professionals. *British Journal of General Practice.* 2006; 56: 6-13.
- 468 4. Mason B, Kerssens JJ, Stoddart A, et al. Unscheduled and out-of-hours care for people in  
469 their last year of life: a retrospective cohort analysis of national datasets. *BMJ open.* 2020; 10:  
470 e041888.
- 471 5. Pivodic L, Pardon K, Miccinesi G, et al. Hospitalisations at the end of life in four European  
472 countries: a population-based study via epidemiological surveillance networks. *J Epidemiol*  
473 *Community Health.* 2016; 70: 430-6.
- 474 6. Luta X, Diernberger K, Bowden J, et al. Healthcare trajectories and costs in the last year of  
475 life: a retrospective primary care and hospital analysis. *BMJ Support Palliat Care.* 2020.
- 476 7. Tanuseputro P, Budhwani S, Bai YQ and Wodchis WP. Palliative care delivery across health  
477 sectors: a population-level observational study. *Palliative medicine.* 2017; 31: 247-57.
- 478 8. Pivodic L, Pardon K, Van den Block L, et al. Palliative care service use in four European  
479 countries: a cross-national retrospective study via representative networks of general practitioners.  
480 *PLoS One.* 2013; 8: e84440.
- 481 9. Brettell R, Fisher R, Hunt H, Garland S, Lasserson D and Hayward G. What proportion of  
482 patients at the end of life contact out-of-hours primary care? A data linkage study in Oxfordshire.  
483 *BMJ open.* 2018; 8: e020244.
- 484 10. Shepperd S, Gonçalves-Bradley DC, Straus SE and Wee B. Hospital at home: home-based  
485 end-of-life care. *Cochrane Database of Systematic Reviews.* 2011.
- 486 11. Oxenham D, Finucane A, Arnold E and Russell P. Delivering preference for place of death in a  
487 specialist palliative care setting. *BMJ Open Quality.* 2013; 2: u201375. w897.
- 488 12. Morin L, Aubry R, Frova L, et al. Estimating the need for palliative care at the population  
489 level: A cross-national study in 12 countries. *Palliat Med.* 2017; 31: 526-36.
- 490 13. Firth AM, Lin CP, Yi DH, et al. How is community based 'out-of-hours' care provided to  
491 patients with advanced illness near the end of life: A systematic review of care provision. *Palliat*  
492 *Med.* 2023; 37: 310-28.
- 493 14. Dixon J, King D, Matosevic T, Clark M and Knapp M. Equity in the provision of palliative care  
494 in the UK: review of evidence. 2015.
- 495 15. Gordon B, Mason B and Smith SLH. Leveraging Telehealth for Delivery of Palliative Care to  
496 Remote Communities: A Rapid Review. *J Palliat Care.* 2022; 37: 213-25.
- 497 16. British Columbia Ministry of Health. Palliative Care: Resource Guide for Patients and  
498 Caregivers. 2017.
- 499 17. Palliative Care Australia. Palliative care service development guidelines. 2018.
- 500 18. National Institute for Clinical Excellence (NICE). Improving supportive and palliative care for  
501 adults with cancer. 2004.
- 502 19. Pask S, Davies JM, Mohamed A, et al. Mind the gaps: understanding and improving out-of-  
503 hours care for people with advanced illness and their informal carers. . *Better End of Life Research*  
504 *report.* 2022.
- 505 20. Garritty C, Gartlehner G, Nussbaumer-Streit B, et al. Cochrane Rapid Reviews Methods  
506 Group offers evidence-informed guidance to conduct rapid reviews. *Journal of clinical epidemiology.*  
507 2021; 130: 13-22.

- 508 21. Tricco AC, Langlois E, Straus SE and Organization WH. *Rapid reviews to strengthen health*  
509 *policy and systems: a practical guide*. World Health Organization, 2017.
- 510 22. Ganann R, Ciliska D and Thomas H. Expediting systematic reviews: methods and implications  
511 of rapid reviews. *Implementation Science*. 2010; 5: 1-10.
- 512 23. Page M, McKenzie J, Bossuyt P, et al. The PRISMA 2020 statement: an updated guideline for  
513 reporting systematic reviews. *Systematic Reviews*, 10 (89), 1–11. 2021.
- 514 24. Rietjens JA, Bramer WM, Geijteman EC, van der Heide A and Oldenmenger WH.  
515 Development and validation of search filters to find articles on palliative care in bibliographic  
516 databases. *Palliat Med*. 2019; 33: 470-4.
- 517 25. Sladek R, Tieman J, Fazekas BS, Abernethy AP and Currow DC. Development of a subject  
518 search filter to find information relevant to palliative care in the general medical literature. *J Med*  
519 *Libr Assoc*. 2006; 94: 394.
- 520 26. Bramer WM, Giustini D, de Jonge GB, Holland L and Bekhuis T. De-duplication of database  
521 search results for systematic reviews in EndNote. *J Med Libr Assoc*. 2016; 104: 240-3.
- 522 27. Veritas Health Innovation. Covidence systematic review software. Melbourne, Australia:  
523 [www.covidence.org](http://www.covidence.org).
- 524 28. Hong QN, Pluye P, Fàbregues S, et al. Mixed methods appraisal tool (MMAT), version 2018.  
525 *Registration of copyright*. 2018; 1148552.
- 526 29. Campbell M, McKenzie JE, Sowden A, et al. Synthesis without meta-analysis (SWiM) in  
527 systematic reviews: reporting guideline. *BMJ*. 2020; 368: l6890.
- 528 30. Donabedian A. The quality of care: how can it be assessed? *JAMA*. 1988; 260: 1743-8.
- 529 31. Coyle YM and Battles J. Using antecedents of medical care to develop valid quality of care  
530 measures. *Int J Qual Health Care*. 1999; 11: 5-12.
- 531 32. Pollock A, Campbell P, Struthers C, et al. Development of the ACTIVE framework to describe  
532 stakeholder involvement in systematic reviews. *J Health Serv Res Policy*. 2019; 24: 245-55.
- 533 54. Rowland C, Hanratty B, Pilling M, van den Berg B and Grande G. The contributions of family  
534 care-givers at end of life: A national post-bereavement census survey of cancer carers' hours of care  
535 and expenditures. *Palliat Med*. 2017; 31: 346-55.
- 536 55. Cohen J and Deliens L, (Eds.). A public health perspective on end of life care. Oxford: Oxford  
537 University Press, 2012.
- 538 56. Coster JE, Turner JK, Bradbury D and Cantrell A. Why do people choose emergency and  
539 urgent care services? A rapid review utilizing a systematic literature search and narrative synthesis.  
540 *Acad Emerg Med*. 2017; 24: 1137-49.
- 541 57. Mills S, Buchanan D, Guthrie B, Donnan P and Smith B. Factors affecting use of unscheduled  
542 care for people with advanced cancer: a retrospective cohort study in Scotland. *British Journal of*  
543 *General Practice*. 2019; 69: e860-e8.
- 544 58. Namasivayam P, Bui DT, Low C, et al. The use of telehealth in the provision of after-hours  
545 palliative care services in rural and remote Australia: A scoping review. *PLoS One*. 2022; 17:  
546 e0274861.
- 547 59. Karliner LS, Jacobs EA, Chen AH and Mutha S. Do professional interpreters improve clinical  
548 care for patients with limited English proficiency? A systematic review of the literature. *Health Serv*  
549 *Res*. 2007; 42: 727-54.
- 550 60. Abedini NC, Downey L, Engelberg RA, Curtis JR and Sharma RK. End-of-life healthcare  
551 utilization and palliative care use among older adults with limited English proficiency. *Journal of the*  
552 *American Geriatrics Society*. 2022; 70: 2847-57.
- 553 61. Fee A, Hasson F, Slater P, et al. Out-of-hours community palliative care: a national survey of  
554 hospice providers. *International journal of palliative nursing*. 2023; 29: 137-43.
- 555 62. Bouter LM, Tijdink J, Axelsen N, Martinson BC and Ter Riet G. Ranking major and minor  
556 research misbehaviors: results from a survey among participants of four World Conferences on  
557 Research Integrity. *Research integrity and peer review*. 2016; 1: 1-8.

- 558 63. Low C, Namasivayam P and Barnett T. Co-designing Community Out-of-hours Palliative Care  
559 Services: A systematic literature search and review. *Palliat Med*. 2023; 37: 40-60.
- 560 64. Staniszewska S, Brett J, Simera I, et al. GRIPP2 reporting checklists: tools to improve  
561 reporting of patient and public involvement in research. *BMJ*. 2017; 358.
- 562 65. Hancock S, Preston N, Jones H and Gadoud A. Telehealth in palliative care is being described  
563 but not evaluated: a systematic review. *Bmc Palliat Care*. 2019; 18: 114.
- 564 66. Finucane AM, O'Donnell H, Lugton J, Gibson-Watt T, Swenson C and Pagliari C. Digital health  
565 interventions in palliative care: a systematic meta-review. *NPJ Digit Med*. 2021; 4: 64.
- 566 67. Leniz J, Weil A, Higginson IJ and Sleeman KE. Electronic palliative care coordination systems  
567 (EPaCCS): a systematic review. *BMJ Support Palliat Care*. 2020; 10: 68-78.
- 568 68. Davies JM, Gao W, Sleeman KE, et al. Using routine data to improve palliative and end of life  
569 care. *BMJ Supportive & Palliative Care*. 2016; 6: 257-62.
- 570 69. Rethlefsen ML, Farrell AM, Trzasko LCO and Brigham TJ. Librarian co-authors correlated with  
571 higher quality reported search strategies in general internal medicine systematic reviews. *Journal of*  
572 *clinical epidemiology*. 2015; 68: 617-26.
- 573 70. Affengruber L, Wagner G, Waffenschmidt S, et al. Combining abbreviated literature searches  
574 with single-reviewer screening: three case studies of rapid reviews. *Syst Rev*. 2020; 9: 162.

### 575 **Studies included in the review**

- 576 33. Baldry C and Balmer S. An audit of out-of-hours advice services provided by hospice staff.  
577 *International journal of palliative nursing*. 2000; 6: 352-6.
- 578 34. Campbell C, Harper A and Elliker M. Introducing 'Palcall': an innovative out-of-hours  
579 telephone service led by hospice nurses. *International journal of palliative nursing*. 2005; 11: 586-90.
- 580 35. Campling N, Birtwistle J, Richardson A, et al. Access to palliative care medicines in the  
581 community: An evaluation of practice and costs using case studies of service models in England. *Int J*  
582 *Nurs Stud*. 2022; 132: 104275.
- 583 36. Carlebach S and Shucksmith J. A review of an out-of-hours telephone support service for  
584 palliative care patients and their families. *International journal of palliative nursing*. 2010; 16: 445-  
585 50.
- 586 37. Elliker M and Barnes L. Setting up an out-of-hours palliative care helpline. *Nursing times*.  
587 2008; 104: 28-9.
- 588 38. Middleton-Green L, Gadoud A, Norris B, et al. 'A Friend in the Corner': supporting people at  
589 home in the last year of life via telephone and video consultation-an evaluation. *BMJ Support Palliat*  
590 *Care*. 2019; 9: e26.
- 591 39. Milton L, Grady A and Cook A. Experiences implementing a 6-month pilot of a 7-day  
592 community CNS service in an urban hospice in Scotland. *International journal of palliative nursing*.  
593 2012; 18: 407-12.
- 594 40. Plummer S and Allan R. Analysis of a network-wide specialist palliative care out-of-hours  
595 advice and support line: a model for the future. *International journal of palliative nursing*. 2011; 17:  
596 494-9.
- 597 41. Purdy S, Lasseter G, Griffin T and Wye L. Impact of the Marie Curie Cancer Care Delivering  
598 Choice Programme in Somerset and North Somerset on place of death and hospital usage: a  
599 retrospective cohort study. *BMJ Support Palliat Care*. 2015; 5: 34-9.
- 600 42. Wye L, Lasseter G, Percival J, Duncan L, Simmonds B and Purdy S. What works in 'real life' to  
601 facilitate home deaths and fewer hospital admissions for those at end of life?: results from a realist  
602 evaluation of new palliative care services in two English counties. *BMC palliative care*. 2014; 13: 1-  
603 11.
- 604 43. Yardley SJ, Codling J, Roberts D, O'Donnell V and Taylor S. Experiences of 24-hour advice line  
605 services: a framework for good practice and meeting NICE guidelines. *International journal of*  
606 *palliative nursing*. 2009; 15: 266-71.

- 607 44. Aranda S, Hayman-White K, Devilee L, O'Connor M and Bence G. Inpatient hospice triage of  
608 'after-hours' calls to a community palliative care service. *International journal of palliative nursing*.  
609 2001; 7: 214-20.
- 610 45. Baird-Bower D, Roach J, Andrews M, Onslow F and Curnin E. Help is just a phone call away:  
611 After-hours support for palliative care patients wishing to die at home. *International journal of*  
612 *palliative nursing*. 2016; 22: 286-91.
- 613 46. Chidell C and Hatton I. After-hours telephone triage. *European journal of palliative care*.  
614 2013; 20: 69-71.
- 615 47. Phillips JL, Davidson PM, Newton PJ and Digiacomio M. Supporting patients and their  
616 caregivers after-hours at the end of life: the role of telephone support. *J Pain Symptom Manage*.  
617 2008; 36: 11-21.
- 618 48. Jiang Y, Gentry AL, Pusateri M and Courtney KL. A Descriptive, Retrospective Study of After-  
619 hours Calls in Hospice and Palliative Care. *J Hosp Palliat Nurs*. 2012; 14: 343-50.
- 620 49. Mayahara M and Fogg L. Examination and Analysis of After-Hours Calls in Hospice. *Am J*  
621 *Hosp Palliat Care*. 2020; 37: 324-8.
- 622 50. Roberts D, Tayler C, MacCormack D and Barwich D. Telenursing in hospice palliative care.  
623 *Can Nurse*. 2007; 103.
- 624 51. Elfrink E, Van Der Rijt C, Van Boxtel R, Elswijk-de Vries P, Van Zuijlen L and Stoter G. Problem  
625 solving by telephone in palliative care: use of a predetermined assessment tool within a program of  
626 home care technology. *Journal of palliative Care*. 2002; 18: 105-10.
- 627 52. Chong PH, Lee J, Yeo ZZ and Ang RQ. Utilisation of after-hours telephone support in a home-  
628 based hospice service. *Bmc Palliat Care*. 2022; 21: 159.
- 629 53. Lin MH, Chen HN and Chen TJ. Changes in 24-Hour Palliative Care Telephone Advice Service  
630 after the Introduction of Discharged End-of-Life Patients' Care Plans. *Int J Environ Res Public Health*.  
631 2020; 17.

Table 2. Overview of the methodology of included studies, grouped according to study type and ordered according to quality appraisal score.

| Authors and year                                                | Location                | Study aim                                                                                                                                                                                                                                                             | Study design                | Participants/ data source                                                          | Reported structures                                                                                                                                                                                                                                             | Reported processes and outcomes                                                                                                                                                                                                    | MMAT score* |
|-----------------------------------------------------------------|-------------------------|-----------------------------------------------------------------------------------------------------------------------------------------------------------------------------------------------------------------------------------------------------------------------|-----------------------------|------------------------------------------------------------------------------------|-----------------------------------------------------------------------------------------------------------------------------------------------------------------------------------------------------------------------------------------------------------------|------------------------------------------------------------------------------------------------------------------------------------------------------------------------------------------------------------------------------------|-------------|
| <b>Observational quantitative studies with comparator (n=3)</b> |                         |                                                                                                                                                                                                                                                                       |                             |                                                                                    |                                                                                                                                                                                                                                                                 |                                                                                                                                                                                                                                    |             |
| Purdy et al., 2015                                              | England, United Kingdom | To investigate the impact of <i>Delivering Choice Programme</i> (DCP) on place of death and hospital usage (emergency department and admissions).                                                                                                                     | Retro-spective cohort study | Patients with palliative care needs who used the DCP provided advice line (n=243). | <p><b>Availability:</b> operating hours.</p> <p><b>Access:</b> eligibility criteria for access.</p> <p><b>Organisation:</b> service provider, responder training, responder duties.</p> <p><b>Integration of service:</b> access to records.</p>                | <p><b>Health care system outcomes:</b> emergency care use, place of death.</p>                                                                                                                                                     | 3           |
| Chong et al., 2022                                              | Singapore               | To stratify reasons for using the phonenumber according to urgency.<br><br>To explore disease and person factors associated with urgent calls.                                                                                                                        | Cross-sectional study       | Out-of-hours calls (n=5273) to the advice line during a 2-year period.             | <p><b>Availability:</b> operating hours.</p> <p><b>Access:</b> eligibility criteria for access.</p> <p><b>Organisation:</b> service provider, responder training.</p> <p><b>Integration of service:</b> actions available to responders, access to records.</p> | <p><b>Service use:</b> number of calls, call timing, call reason, urgency of calls.</p> <p><b>Call handling:</b> responder action, HCP follow-up.</p> <p><b>Health care system outcomes:</b> hospital admission</p>                | 2           |
| Baird-Bower et al., 2016                                        | Tasmania, Australia     | To evaluate the use of a state-wide after-hours palliative care support number ( <i>1800HOPSICE</i> ) and design a more proactive support model.<br><br>To evaluate the use of <i>1800HOSPICE</i> in reducing ambulance contacts and emergency department admissions. | Cross-sectional study       | Calls (n=458) to the advice line during a 6-month period.                          | <p><b>Availability:</b> operating hours.</p> <p><b>Access:</b> eligibility criteria for access.</p> <p><b>Organisation:</b> service provider, responder training, responder duties.</p> <p><b>Integration of service:</b> actions available to responders.</p>  | <p><b>Service use:</b> number of calls, caller identity, call timing, call reason.</p> <p><b>Health care system outcomes:</b> ambulance contacts and emergency department admissions.</p> <p><b>Costs:</b> staff salary costs.</p> | 2           |

| Authors and year                               | Location                    | Study aim                                                                                                                                                                                                                                                                | Study design         | Participants/ data source                                               | Reported structures                                                                                                                                                                                                                                            | Reported processes and outcomes                                                                                          | MMAT score* |
|------------------------------------------------|-----------------------------|--------------------------------------------------------------------------------------------------------------------------------------------------------------------------------------------------------------------------------------------------------------------------|----------------------|-------------------------------------------------------------------------|----------------------------------------------------------------------------------------------------------------------------------------------------------------------------------------------------------------------------------------------------------------|--------------------------------------------------------------------------------------------------------------------------|-------------|
| <b>Quantitative (without comparator) (n=5)</b> |                             |                                                                                                                                                                                                                                                                          |                      |                                                                         |                                                                                                                                                                                                                                                                |                                                                                                                          |             |
| Jiang et al., 2012                             | Pennsylvania, United States | To describe the timing of after-hours telephone triage services<br>To describe the reasons for access to after-hours services<br>To describe the nursing interventions offered.                                                                                          | Retro-spective study | Calls (n=4434) to the advice line during a 12-month period.             | <b>Availability:</b> operating hours.<br><b>Access:</b> eligibility criteria for access.<br><b>Organisation:</b> service provider, responder training, responder duties.<br><b>Integration of service:</b> actions available to responders, access to records. | <b>Service use:</b> number of calls, call timing, call reason.<br><b>Call handling:</b> responder action, HCP follow-up. | 3           |
| Mayahara & Fogg, 2020                          | Illinois, United States     | To better understand the types of after-hours calls received by a hospice agency.<br>To identify factors that contribute to potentially avoidable after-hours calls in home hospice<br>To examine differences between patient care teams in utilizing after-hours calls. | Retro-spective study | Out-of-hours calls (n=1596) to the advice line during a 6-month period. | <b>Availability:</b> operating hours.<br><b>Access:</b> eligibility criteria for access.<br><b>Organisation:</b> service provider, responder training, responder duties.<br><b>Integration of service:</b> actions available to responders, access to records. | <b>Service use:</b> number of calls, call timing, call reason.<br><b>Call handling:</b> responder action, HCP follow-up. | 3           |
| Aranda et al., 2001                            | Victoria, Australia         | To identify patterns of use of an after-hours service providing palliative care.                                                                                                                                                                                         | Retro-spective study | Out-of-hours calls (n=629) received during 1996-1997.                   | <b>Availability:</b> operating hours.<br><b>Access:</b> eligibility criteria for access.<br><b>Organisation:</b> service provider, responder training, responder duties.<br><b>Integration of service:</b> actions available to responders, access to records. | <b>Service use:</b> number of calls, call timing, call reason.<br><b>Call handling:</b> responder action, HCP follow-up. | 2           |



| Authors and year             | Location                | Study aim                                                                                                                                                                                                              | Study design         | Participants/ data source                                                                      | Reported structures                                                                                                                                                                                                                                            | Reported processes and outcomes                                                                                                                                                                                         | MMAT score* |
|------------------------------|-------------------------|------------------------------------------------------------------------------------------------------------------------------------------------------------------------------------------------------------------------|----------------------|------------------------------------------------------------------------------------------------|----------------------------------------------------------------------------------------------------------------------------------------------------------------------------------------------------------------------------------------------------------------|-------------------------------------------------------------------------------------------------------------------------------------------------------------------------------------------------------------------------|-------------|
| Elfrink et al., 2002         | The Netherlands         | To evaluate the out-of-hours telephone service.<br>To explore: who called for assistance; what was the reason for calling; was it possible to solve the problem over phone and; what was the time investment per call? | Retro-spective study | Calls (n=157) to the advice line during the 3-year period.                                     | <b>Availability:</b> operating hours.<br><b>Access:</b> eligibility criteria for access.<br><b>Organisation:</b> service provider, responder training, responder duties.<br><b>Integration of service:</b> actions available to responders, access to records. | <b>Service use:</b> number of calls, call timing, call reason.<br><b>Call handling:</b> responder action, HCP follow-up.<br><b>Costs:</b> time required for staff to run the service                                    | 2           |
| Lin et al., 2020             | Taiwan                  | To review calls made to the telephone advice service<br>To compare call volume in 2017 and 2018.<br>To explore the influence of introducing personalized care plans for discharged patients.                           | Retro-spective study | Calls (n=728) to the advice line during a 2-year period.                                       | <b>Availability:</b> operating hours.<br><b>Access:</b> eligibility criteria for access.<br><b>Organisation:</b> service provider, responder training, responder duties.<br><b>Integration of service:</b> actions available to responders.                    | <b>Service use:</b> number of calls, call timing, call reason.                                                                                                                                                          | 1           |
| <b>Mixed-methods (n=5)</b>   |                         |                                                                                                                                                                                                                        |                      |                                                                                                |                                                                                                                                                                                                                                                                |                                                                                                                                                                                                                         |             |
| Campling et al. 2022         | England, United Kingdom | To evaluate patient and carer access to medicines at end-of-life within the context of models of service delivery.                                                                                                     | Case study           | Interviews with patients (n=6) and carers (n=3) who had called the advice line at least twice. | <b>Availability:</b> operating hours.<br><b>Access:</b> eligibility criteria for access.<br><b>Organisation:</b> service provider, responder training, responder duties.<br><b>Integration of service:</b> actions available to responders, access to records. | <b>Service use:</b> number of calls.<br><b>Call handling:</b> responder action, HCP follow-up.<br><b>Patient/carer outcomes:</b> user satisfaction, symptom management.<br><b>Costs:</b> cost of providing the service. | 4           |
| Middleton-Green et al., 2019 | England, United Kingdom | To evaluate a 24/7, nurse-led telephone and video-consultation support service                                                                                                                                         | Service evaluation   | Calls (n=4533) to the advice line from patients on                                             | <b>Availability:</b> operating hours.<br><b>Access:</b> eligibility criteria for access.                                                                                                                                                                       | <b>Service use:</b> number of calls, call timing.                                                                                                                                                                       | 4           |

| Authors and year              | Location                 | Study aim                                                                                                                                    | Study design       | Participants/ data source                                                                                                                            | Reported structures                                                                                                                                                                                                                                                               | Reported processes and outcomes                                                                                                                                                                                                                                                    | MMAT score* |
|-------------------------------|--------------------------|----------------------------------------------------------------------------------------------------------------------------------------------|--------------------|------------------------------------------------------------------------------------------------------------------------------------------------------|-----------------------------------------------------------------------------------------------------------------------------------------------------------------------------------------------------------------------------------------------------------------------------------|------------------------------------------------------------------------------------------------------------------------------------------------------------------------------------------------------------------------------------------------------------------------------------|-------------|
|                               |                          | ( <i>Gold Line</i> ) for patients at the end of their lives.                                                                                 |                    | the case load (n=1813) during a 12-month period. Follow-up interviews with patients (n=8) and carers (n=6).                                          | <p><b>Organisation:</b> service provider, responder training, responder duties.</p> <p><b>Integration of service:</b> actions available to responders, access to records.</p>                                                                                                     | <p><b>Call handling:</b> responder action, clinical follow-up.</p> <p><b>Patient/carer outcome:</b> user satisfaction, emotional support/wellbeing</p> <p><b>Health care system outcomes:</b> hospitalisation, continued care at home</p>                                          |             |
| Carlebach & Shuck-smith, 2010 | England, United Kingdom  | To discover what impact an out-of-hours telephone service had on the perceived quality of care of palliative care patients and their carers. | Service evaluation | Calls (n≈1320) to the advice line during a 2-year period. Interviews with patients (n=6), carers and former carers (n=8) who called the advice line. | <p><b>Organisation:</b> service provider, responder training, duties.</p> <p><b>Integration of service:</b> actions available to responders.</p>                                                                                                                                  | <p><b>Service use:</b> number of calls, caller identity.</p> <p><b>Patient/carer outcomes:</b> user satisfaction, emotional support/wellbeing.</p>                                                                                                                                 | 3           |
| Milton et al., 2012           | Scotland, United Kingdom | To examine the need for, and use of, an enhanced 7-day community clinical nurse specialist (CNS) service.                                    | Service evaluation | Calls (n=132) to the advice line during a 6-month period. Telephone survey with family members (n=14) and patients (n=3) who had called.             | <p><b>Availability:</b> operating hours.</p> <p><b>Access:</b> eligibility criteria for access.</p> <p><b>Organisation:</b> service provider, responder training, responder duties.</p> <p><b>Integration of service:</b> actions available to responders, access to records.</p> | <p><b>Service use:</b> number of calls, timing of calls, call reason</p> <p><b>Call handling:</b> clinical follow-up.</p> <p><b>Patient/carer outcomes:</b> emotional support, symptom management, caring capacity; user satisfaction.</p> <p><b>Costs:</b> staff salary costs</p> | 2           |
| Phillips et al., 2008         | Australia                | To evaluate a 20-month trial of the After-Hours Telephone Support Service                                                                    | Service evaluation | Calls (n=55) to the advice line from patients (n=7)                                                                                                  | <p><b>Availability:</b> operating hours.</p> <p><b>Access:</b> eligibility criteria for access.</p>                                                                                                                                                                               | <p><b>Service use:</b> number of calls, timing of calls, call duration, call reason.</p>                                                                                                                                                                                           | 2           |

| Authors and year                   | Location                | Study aim                                                                                                                                                                                                           | Study design       | Participants/<br>data source                                                                                                                                               | Reported structures                                                                                                                                                                                                                              | Reported processes and outcomes                                                                                                                                                                         | MMAT score*      |
|------------------------------------|-------------------------|---------------------------------------------------------------------------------------------------------------------------------------------------------------------------------------------------------------------|--------------------|----------------------------------------------------------------------------------------------------------------------------------------------------------------------------|--------------------------------------------------------------------------------------------------------------------------------------------------------------------------------------------------------------------------------------------------|---------------------------------------------------------------------------------------------------------------------------------------------------------------------------------------------------------|------------------|
|                                    |                         |                                                                                                                                                                                                                     |                    | and carers (n=28). Interviews with carers (n=8) who had called.                                                                                                            | <p><b>Organisation:</b> service provider, responder training, responder duties.</p> <p><b>Integration of service:</b> actions available to responders, access to records.</p>                                                                    | <p><b>Call handling:</b> clinical follow-up.</p> <p><b>Patient/carer outcome:</b> user satisfaction, emotional support, caring/decision-making capacity.</p> <p><b>Costs:</b> staff salary costs.</p>   |                  |
| <b>Qualitative (n=1)</b>           |                         |                                                                                                                                                                                                                     |                    |                                                                                                                                                                            |                                                                                                                                                                                                                                                  |                                                                                                                                                                                                         |                  |
| Wye et al., 2014                   | England, United Kingdom | To present a realist evaluation of the end-of-life care services involved in the <i>Delivering Choice Programme</i> (DCP), exploring why users more often died at home and appeared to use fewer hospital services. | Realist evaluation | Interviews with family carers and service users (n=43), professionals who delivered or managed DCP services (n=11), and staff eligible to use services but had not (n=94). | <p><b>Availability:</b> operating hours.</p> <p><b>Access:</b> eligibility criteria for access.</p> <p><b>Organisation:</b> service provider, responder training, responder duties.</p> <p><b>Integration of service:</b> access to records.</p> | <p><b>Service use:</b> number of calls.</p> <p><b>Patient/carer outcome:</b> user satisfaction, emotional support.</p> <p><b>Health care system outcomes:</b> care service use, emergency care use.</p> | 5                |
| <b>Non-empirical studies (n=7)</b> |                         |                                                                                                                                                                                                                     |                    |                                                                                                                                                                            |                                                                                                                                                                                                                                                  |                                                                                                                                                                                                         |                  |
| Baldry & Balmer, 2000              | England, United Kingdom | No explicit research aim stated, but the article describes how the service was set up, presents the results of a 12-month audit of the service, and describes subsequent initiatives taken.                         | Audit              | Advice queries (n=443) received by the service during a 12-month period.                                                                                                   | <p><b>Availability:</b> operating hours.</p> <p><b>Organisation:</b> service provider, responder training, responder duties.</p> <p><b>Integration of service:</b> actions available to responders, access to records.</p>                       | <p><b>Service use:</b> number of calls, caller identity, call timing, call reason.</p> <p><b>Call handling:</b> responder action, HCP follow-up.</p>                                                    | N/A <sup>1</sup> |

| Authors and year       | Location                | Study aim                                                                                                                                                                                                            | Study design | Participants/ data source                                                                                                | Reported structures                                                                                                                                                                                                                                                               | Reported processes and outcomes                                                                                                                                                                | MMAT score*      |
|------------------------|-------------------------|----------------------------------------------------------------------------------------------------------------------------------------------------------------------------------------------------------------------|--------------|--------------------------------------------------------------------------------------------------------------------------|-----------------------------------------------------------------------------------------------------------------------------------------------------------------------------------------------------------------------------------------------------------------------------------|------------------------------------------------------------------------------------------------------------------------------------------------------------------------------------------------|------------------|
| Campbell et al., 2005  | England, United Kingdom | No explicit research aim stated, but the article reports the results of an out-of-hours telephone service ( <i>Palcall</i> ) in the first 18 months of service.                                                      | Audit        | Calls (n=517) to the advice line during an 18-month period. Feedback questionnaires from callers (n=100).                | <p><b>Availability:</b> operating hours.</p> <p><b>Access:</b> eligibility criteria for access.</p> <p><b>Organisation:</b> service provider, responder training, responder duties.</p> <p><b>Integration of service:</b> actions available to responders, access to records.</p> | <p><b>Service use:</b> number of calls, caller identity, call timing, call reason.</p> <p><b>Call handling:</b> responder action.</p> <p><b>Patient/carer outcomes:</b> user satisfaction.</p> | N/A <sup>1</sup> |
| Chidell & Hatton, 2013 | Victoria, Australia     | Not explicit research aim stated, but the article describes an after-hours palliative care telephone support service                                                                                                 | Audit        | Patients and family members (n=258) who called one of three services during a 1-month period.                            | <p><b>Availability:</b> operating hours.</p> <p><b>Access:</b> eligibility criteria for access.</p> <p><b>Organisation:</b> service provider, responder training.</p> <p><b>Integration of service:</b> actions available to responders, access to records.</p>                   | <p><b>Service use:</b> number of calls, call timing, call reason.</p> <p><b>Call handling:</b> responder action, HCP follow-up.</p>                                                            | N/A <sup>1</sup> |
| Elliker & Barnes, 2008 | England, United Kingdom | No explicit research aim stated, but the article describes the development and implementation of a nurse-led, out-of-hours information telephone service for patients with palliative care needs ( <i>Palcall</i> ). | Audit        | Out-of-hours calls (n=2860) to the advice line since its start. Feedback questionnaires from first-time callers (n=385). | <p><b>Availability:</b> operating hours.</p> <p><b>Access:</b> eligibility criteria for access.</p> <p><b>Organisation:</b> service provider, responder training, responder duties.</p> <p><b>Integration of service:</b> actions available to responders.</p>                    | <p><b>Service use:</b> number of calls, call timing.</p> <p><b>Call handling:</b> responder action, HCP follow-up.</p> <p><b>Patient/carer outcomes:</b> user satisfaction</p>                 | N/A <sup>1</sup> |
| Plummer & Allan, 2011  | England, United Kingdom | No explicit research aim stated, but the article reports results from an audit to evaluate the service and determine whether the advice provided by the call                                                         | Audit        | Patients or carers who had called the advice line and completed a questionnaire (n=70).                                  | <p><b>Availability:</b> operating hours.</p> <p><b>Access:</b> eligibility criteria for access.</p> <p><b>Organisation:</b> service provider, responder training, responder duties.</p>                                                                                           | <p><b>Service use:</b> number of calls, timing of calls, call duration, call reason.</p> <p><b>Call handling:</b> responder action, clinical follow-up.</p>                                    | N/A <sup>1</sup> |

| Authors and year     | Location                 | Study aim                                                                                                                                                                                                             | Study design        | Participants/ data source                                                                                              | Reported structures                                                                                                                                                                                                                                            | Reported processes and outcomes                                                                                                                                                                                                                           | MMAT score*      |
|----------------------|--------------------------|-----------------------------------------------------------------------------------------------------------------------------------------------------------------------------------------------------------------------|---------------------|------------------------------------------------------------------------------------------------------------------------|----------------------------------------------------------------------------------------------------------------------------------------------------------------------------------------------------------------------------------------------------------------|-----------------------------------------------------------------------------------------------------------------------------------------------------------------------------------------------------------------------------------------------------------|------------------|
|                      |                          | handlers helped prevent hospital admission.                                                                                                                                                                           |                     |                                                                                                                        | <b>Integration of service:</b> actions available to responders, access to records.                                                                                                                                                                             | <b>Patient/carer outcome:</b> user satisfaction, emotional support. <b>Health care system outcomes:</b> care service use, emergency care use.                                                                                                             |                  |
| Roberts et al., 2007 | British Columbia, Canada | No explicit research aim stated, but the article outlines the use of tele-communication to merge an existing tele-triage and health information phone line with specialized community-based palliative care services. | Service description | Calls (n=498) to the advice line during a 2-year period. Follow-up with one bereaved carer who called the advice line. | <b>Availability:</b> operating hours.<br><b>Access:</b> eligibility criteria for access.<br><b>Organisation:</b> service provider, responder training, responder duties.<br><b>Integration of service:</b> actions available to responders, access to records. | <b>Service use:</b> number of calls, call reason.<br><b>Call handling</b> and follow-responder action, clinical follow-up.<br><b>Patient/carer outcome:</b> user satisfaction, emotional support<br><b>Health care system outcomes:</b> care service use. | N/A <sup>1</sup> |
| Yardley et al., 2009 | United Kingdom           | No explicit research aim stated, but the article presents a model for implementing a 24-hour specialist palliative care advice line, illustrated by two case examples.                                                | Case report         | Calls to two advice line services (total n=788).                                                                       | <b>Availability:</b> operating hours.<br><b>Organisation:</b> service provider, responder training (in one case).<br><b>Integration of service:</b> actions available to responders.                                                                           | <b>Service use:</b> number of calls, call timing, call reason, call duration.<br><b>Call handling:</b> responder action, clinical follow-up.                                                                                                              | N/A <sup>1</sup> |

\* The Mixed-Methods Appraisal Tool (MMAT) can yield a score ranging between 1, i.e., one quality criteria met (20%) for the specific study type, and 5, i.e., five quality criteria met (100%).

<sup>1</sup> Not considered empirical studies based on the screening questions in the MMAT.

Figure 2. Summary of reported study findings applied to Donabedian's<sup>1</sup> framework of structures, processes, and outcomes of care.

| <i>Structures of care</i>                                                                                                                                                                                                                                                                                                                                                                                            | <i>Processes of care</i>                                                                                                                                                                                                                                                                                                                                                                                                                                                                                         | <i>Outcomes of care</i>                                                                                                                                                                                                                                                                                                                                                                                                                                                                                     |                                                                                                                                                                                                                                                                                                                                                                                                                            |                                                                                                                                                                                                                                                        |
|----------------------------------------------------------------------------------------------------------------------------------------------------------------------------------------------------------------------------------------------------------------------------------------------------------------------------------------------------------------------------------------------------------------------|------------------------------------------------------------------------------------------------------------------------------------------------------------------------------------------------------------------------------------------------------------------------------------------------------------------------------------------------------------------------------------------------------------------------------------------------------------------------------------------------------------------|-------------------------------------------------------------------------------------------------------------------------------------------------------------------------------------------------------------------------------------------------------------------------------------------------------------------------------------------------------------------------------------------------------------------------------------------------------------------------------------------------------------|----------------------------------------------------------------------------------------------------------------------------------------------------------------------------------------------------------------------------------------------------------------------------------------------------------------------------------------------------------------------------------------------------------------------------|--------------------------------------------------------------------------------------------------------------------------------------------------------------------------------------------------------------------------------------------------------|
| Telephone advice line characteristics (n=20)                                                                                                                                                                                                                                                                                                                                                                         | Service use (n=18)                                                                                                                                                                                                                                                                                                                                                                                                                                                                                               | Patient & carer outcomes (n=8)                                                                                                                                                                                                                                                                                                                                                                                                                                                                              | Health care system outcomes (n=7)                                                                                                                                                                                                                                                                                                                                                                                          | Costs (n=2)                                                                                                                                                                                                                                            |
| <ul style="list-style-type: none"> <li>• 13 of 20 services available 24/7</li> <li>• Access primarily for patients known to services</li> <li>• All lines manned by clinically trained staff*, most often registered nurses in hospices.</li> <li>• Staff usually respond to calls on top of normal workload.</li> <li>• 12 services had some access to patient records, but level of integration varies.</li> </ul> | <ul style="list-style-type: none"> <li>• 45-88% of callers were family members or informal carers</li> <li>• 19-69% of calls received during OOH</li> <li>• OOH calls peak during weeknights</li> <li>• Reasons for calling (n=14) commonly concerned:               <ul style="list-style-type: none"> <li>- Managing symptoms (n=12)</li> <li>- Health deterioration (n=12)</li> <li>- Nursing advice (n=9)</li> <li>- Requests for home visit, medicines, admission, or supplies (n=7)</li> </ul> </li> </ul> | <ul style="list-style-type: none"> <li>• Knowing where to turn is reassuring (n=6)</li> <li>• Provision of information and guidance:               <ul style="list-style-type: none"> <li>- Enables continued care at home (n=4)</li> <li>- Helps handling crises (n=3)</li> </ul> </li> <li>• Provision of emotional support:               <ul style="list-style-type: none"> <li>- Talking to someone relieves worry (n=4)</li> <li>- Promotes empowerment and independence (n=2)</li> </ul> </li> </ul> | <ul style="list-style-type: none"> <li>• Patients who accessed phonelines:               <ul style="list-style-type: none"> <li>- Generally remained at home 24 hours after call (n=4)</li> <li>- Were less likely to use urgent care services, e.g., contact ambulance or ED attendance (n=2)</li> <li>- Had lower risk of hospital admission in last week of life, and of dying in hospital (n=1)</li> </ul> </li> </ul> | <ul style="list-style-type: none"> <li>• Advice lines incur slightly higher costs for OOH medicine prescription than other models of care (n=1)</li> <li>• Advice lines might generate future cost-saving due to less urgent care use (n=1)</li> </ul> |

Notes: n signifies the number of studies reporting an outcome.

\* Minimum health care assistant level

<sup>1</sup> Donabedian. The quality of care: how can it be assessed? *JAMA*. 1988; 260: 1743-8.

Table 3. Characteristics of telephone advice line services reported in the included studies.

| Study                            | Availability                  | Access                                                                                                                                                                                 | Structure                                                                                                                                                      |                                                                      |                                                       | Integration of service                                                                                                       |                                                                          |
|----------------------------------|-------------------------------|----------------------------------------------------------------------------------------------------------------------------------------------------------------------------------------|----------------------------------------------------------------------------------------------------------------------------------------------------------------|----------------------------------------------------------------------|-------------------------------------------------------|------------------------------------------------------------------------------------------------------------------------------|--------------------------------------------------------------------------|
|                                  | Operating hours               | Eligibility criteria for accessing the advice line                                                                                                                                     | Telephone advice line provider and funding                                                                                                                     | Profession and level of clinical training of responders              | Additional duties for responders                      | Actions available for responders take                                                                                        | Responder access to patient records                                      |
| <b>Aranda et al., 2001</b>       | 17:00–08:30                   | Yes, patients registered with the service provider and their carers.                                                                                                                   | A community palliative care service providing home care in an urban area. Funding not stated.                                                                  | Senior hospice nurse (night nurse or after-hours nurse coordinator). | Yes, care of hospice inpatients.                      | Advice and support over the phone, refer the call to community palliative care nurse who could make home visits.             | No, but limited information about patients was provided during handover. |
| <b>Baird-Bower et al., 2016</b>  | 24 hours/7 days a week (24/7) | None                                                                                                                                                                                   | A state-wide multidisciplinary primary palliative care service in a primarily rural area. The service received government funding as part of 4-year programme. | Registered nurse                                                     | None, responders are designated to staff advice line. | Support or information over the phone, transfer call to appropriate services.                                                | Not stated                                                               |
| <b>Baldry &amp; Balmer, 2000</b> | 24/7                          | Not stated                                                                                                                                                                             | A local hospice for adults with life-limiting illness. Funding not stated.                                                                                     | Hospice nurse                                                        | Yes, care of hospice inpatients.                      | Advice and support over the phone, referral to community OOH services or palliative care consultant the next working day.    | Yes                                                                      |
| <b>Campbell et al., 2005</b>     | 24/7                          | Yes, patients registered with advice line service by an HCP; an advanced incurable progressive disease or complex symptom and psychosocial problems earlier in the disease trajectory. | A telephone support service operated at a local hospice. The service was funded by a Big Lottery Fund grant.                                                   | Experienced palliative care nurse                                    | Yes, care of hospice inpatients.                      | Advice and support over the phone, referral to evening district nurse or GP for home visits, arranging next day appointments | Yes                                                                      |
| <b>Campling et al. 2022</b>      | 24/7                          | Yes, listing on the Gold Standards Framework register.                                                                                                                                 | A regional palliative care telephone support line embedded within wider care services in a rural area. Funding not stated.                                     | Staff include experienced NHS nurses trained in palliative care.     | None.                                                 | Advice over the phone, medicine prescription through co-ordination with other OOH services.                                  | Yes                                                                      |

|                                         | <i>Availability</i>                                             | <i>Access</i>                                                                                     | <i>Structure</i>                                                                                                                                                         |                                                                        |                                                                                    | <i>Integration of service</i>                                                                                                                     |                                            |
|-----------------------------------------|-----------------------------------------------------------------|---------------------------------------------------------------------------------------------------|--------------------------------------------------------------------------------------------------------------------------------------------------------------------------|------------------------------------------------------------------------|------------------------------------------------------------------------------------|---------------------------------------------------------------------------------------------------------------------------------------------------|--------------------------------------------|
| <b>Study</b>                            | <b>Operating hours</b>                                          | <b>Eligibility criteria for accessing the advice line</b>                                         | <b>Telephone advice line provider and funding</b>                                                                                                                        | <b>Profession and level of clinical training of responders</b>         | <b>Additional duties for responders</b>                                            | <b>Actions available for responders take</b>                                                                                                      | <b>Responder access to patient records</b> |
| <b>Carlebach &amp; Shucksmith, 2010</b> | Not stated                                                      | Not stated but appears only available to patients known to the service provider and their carers. | An out-of-hours support service for home-based palliative patients and their carers which operates out of a local hospice in one primary care trust. Funding not stated. | Registered nurse, health care assistant.                               | Not stated, but advice line appears to be manned by on-duty hospice staff.         | Advice over the phone, arrange follow-up call, referral to an on-call specialist palliative care team for home visits or delivery of pain relief. | Not stated                                 |
| <b>Chidell &amp; Hatton, 2013</b>       | Weekdays 17:00–07:00, 24-hours on weekends and public holidays. | Yes, patients registered with one of the service providers and their carers.                      | A local hospice to patients and carers in a region covering both urban and rural areas. The service received government funding                                          | Nurse                                                                  | Not stated, but responders appear to be designated triage nurses.                  | Depends on region, can include referral to OOH visiting service or emergency home visits.                                                         | Yes                                        |
| <b>Chong et al., 2022</b>               | 18:00–08:30                                                     | Yes, patients registered with the service provider and their carers.                              | A large multidisciplinary home hospice service for home-based patients with palliative care needs in a primarily urban area. Funding not stated.                         | Hospice nurse                                                          | Not stated, but responding staff are on-call.                                      | Advice over the phone, arranging for OOH or next-day home visits.                                                                                 | Yes                                        |
| <b>Elfrink et al., 2002</b>             | 24/7                                                            | Yes, patients admitted to the home care program.                                                  | Service delivered as part of a home care program in the palliative care unit of an in-patient cancer institute. Funding not stated.                                      | Inpatient hospice staff                                                | Yes, usual in-patient care duties.                                                 | Support over the phone, referral for on call medical advice, referral for in-hours home visit by a CNS.                                           | Yes                                        |
| <b>Elliker &amp; Barnes, 2008</b>       | Weekdays 18:00–02:00, weekends and public holidays 10:00–02:00. | Yes, patients registered with advice line service by an HCP.                                      | The telephone support service operated at a local hospice in a primarily rural area. Funded by a Big Lottery 3-year grant.                                               | Clinical nurse specialist (CNS) in hours, hospice nurses out of hours. | Yes, in-patient care but advice line nurse is additional to the usual staff quota. | Advice and support over the phone, technical troubleshooting, consulting OOH doctor.                                                              | Not stated                                 |
| <b>Jiang et al., 2012</b>               | 24/7                                                            | Yes, patients registered with the service provider and their carers.                              | A large local hospice and palliative care organization. Funding not stated.                                                                                              | Hospice nurse                                                          | None                                                                               | Advice and support over the phone, referral to evening district nurse, or next day appointment.                                                   | Yes                                        |



|                                        | <i>Availability</i>    | <i>Access</i>                                                                                                                                                                | <i>Structure</i>                                                                                                                                |                                                                |                                                                                   | <i>Integration of service</i>                                                                                                                                                           |                                            |
|----------------------------------------|------------------------|------------------------------------------------------------------------------------------------------------------------------------------------------------------------------|-------------------------------------------------------------------------------------------------------------------------------------------------|----------------------------------------------------------------|-----------------------------------------------------------------------------------|-----------------------------------------------------------------------------------------------------------------------------------------------------------------------------------------|--------------------------------------------|
| <b>Study</b>                           | <b>Operating hours</b> | <b>Eligibility criteria for accessing the advice line</b>                                                                                                                    | <b>Telephone advice line provider and funding</b>                                                                                               | <b>Profession and level of clinical training of responders</b> | <b>Additional duties for responders</b>                                           | <b>Actions available for responders take</b>                                                                                                                                            | <b>Responder access to patient records</b> |
| <b>Lin et al., 2020</b>                | 24/7                   | Yes, patients registered with the service provider and their carers.                                                                                                         | A specialist palliative care team at a large metropolitan Veterans Hospital. Funding not stated.                                                | Nursing assistants during daytime, specialist nurse during OOH | Yes                                                                               | Support over the phone, referral to specialist nurses.                                                                                                                                  | Not stated                                 |
| <b>Mayahara &amp; Fogg, 2020</b>       | 24/7                   | Yes, patients registered with the service provider and their carers.                                                                                                         | A large not-for-profit hospice with 9 clinical teams. Funding not stated.                                                                       | Triage nurse                                                   | None                                                                              | Support over the phone, referral on to nurse in hours, advice from nurse OOH                                                                                                            | Not stated                                 |
| <b>Middleton-Green et al., 2019</b>    | 24/7                   | Yes, community-living patients in a wider region; identified as potentially being in the last year of life; being registered to the Gold Standards Framework by an HCP.      | A teleconsultation hub at a local hospital which covers a region of both urban and rural areas. Funding not stated.                             | Senior nurse experienced in teleconsultation                   | None                                                                              | Advice and support over the phone, referral for home visit                                                                                                                              | Yes, full electronic patient record.       |
| <b>Milton et al., 2012<sup>2</sup></b> | 24/7                   | Yes, patients registered with the local hospice and their carers.                                                                                                            | A community CNS service at local hospice in an urban area. The phonenumber service was funded by the hospice                                    | Hospice in-patient unit staff, CNS                             | In part: the hospice staff have usual care duties, while CNS team was designated. | Advice and support over the phone, transfer call to CNS team who could advise callers, consult palliative care doctors, arrange OOH GP/community nurse home visit, or hospice admission | Yes                                        |
| <b>Phillips et al., 2008</b>           | 17:00–08:30            | Yes, patients registered with the local specialist palliative care team and their carers, or veterans whose palliative care was coordinated by a local home/nursing service. | A local multipurpose service providing a range of health and social care services in a rural community. The service received government funding | Registered nurse                                               | Yes                                                                               | Support over the phone, nursing advice, referral on for GP advice, next day medical review                                                                                              | Yes                                        |

|                                            | <i>Availability</i>                                | <i>Access</i>                                                                                                                                                         | <i>Structure</i>                                                                                                                                                                                                               |                                                                    |                                                               | <i>Integration of service</i>                                                                                                                  |                                            |
|--------------------------------------------|----------------------------------------------------|-----------------------------------------------------------------------------------------------------------------------------------------------------------------------|--------------------------------------------------------------------------------------------------------------------------------------------------------------------------------------------------------------------------------|--------------------------------------------------------------------|---------------------------------------------------------------|------------------------------------------------------------------------------------------------------------------------------------------------|--------------------------------------------|
| <b>Study</b>                               | <b>Operating hours</b>                             | <b>Eligibility criteria for accessing the advice line</b>                                                                                                             | <b>Telephone advice line provider and funding</b>                                                                                                                                                                              | <b>Profession and level of clinical training of responders</b>     | <b>Additional duties for responders</b>                       | <b>Actions available for responders take</b>                                                                                                   | <b>Responder access to patient records</b> |
| <b>Plummer &amp; Allan, 2011</b>           | 24/7                                               | Yes, service is available to patients and carers living in the geographical areas covered by the network.                                                             | A regional cancer network comprising multiple care providers covering a region of both urban and rural areas. The phonenumber was funded by the providing services.                                                            | Experienced specialist nursing staff                               | None                                                          | Support over the phone, symptom advice, referral for OOH advice from GP or palliative care doctor, signpost to OOH support from other services | No                                         |
| <b>Purdy et al., 2015; Wye et al. 2014</b> | Weekdays 17:00–01:00, weekends and public holidays | None, all palliative patients, regardless of condition, in the region were eligible to use the Delivering Choice Programme (DCP) services, including the advice line. | A local hospice covering both urban and rural areas. The DCP received funding support from Marie Curie Cancer Care.                                                                                                            | Specialist palliative care nurse                                   | None until 01:00, in-patient care in the hospice 01:00–08:00. | Not stated in detail, nursing support and medication advice over the phone.                                                                    | Yes                                        |
| <b>Roberts et al., 2007</b>                | 21:00-08:00                                        | Yes, enrolment in the local hospice program was required to obtain the advice line number                                                                             | A regional medical advice and triage line partnered with a local hospice. Funding not stated, but the service uses an already-existing on-call palliative response nurse.                                                      | Home care nurse (no specialist palliative care experience)         | Yes                                                           | Support, transfer to palliative RN for symptom advice, onward referral to CNS or doctor                                                        | Yes                                        |
| <b>Yardley et al., 2009</b>                | 24/7 for both case 1 and 2                         | Not stated, though in case 2 it is mentioned that more than half the calls are about patients not known to hospice services.                                          | <i>Case 1</i> includes six hospices with inpatient units within a regional cancer network. <i>Case 2</i> was a hospice with inpatient beds across two sites. The service in case 2 was funded by local commissioning services. | <i>Case 1</i> : not stated<br><i>Case 2</i> : Senior hospice nurse | Not stated for case 1 or 2                                    | Support, medication advice, information on services, referral on to palliative care doctor on call                                             | Not stated for case 1 or 2                 |

Notes: OOH – out-of-hours
